# Supplementary material
Source: Springer Nature journal article supplement (https://www.springermedizin.de/resource/supplementary/12879_2012_2418_MOESM2_ESM.pdf/9444534)

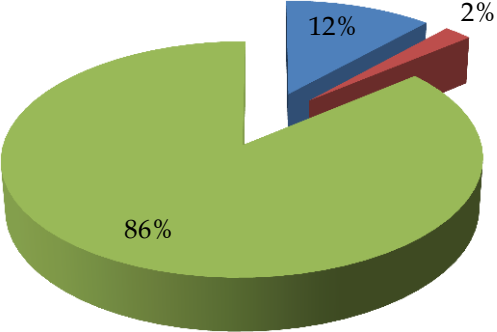

■ Rotavirus

■ Adenovirus

■ Negative

Supplement: MOESM2 [file 9444534]
